# Supplementary material for: Radiomics in Head and Neck Cancer Outcome Predictions
Source: Diagnostics (Basel). 2022 Nov 8;12(11):2733. doi: 10.3390/diagnostics12112733 (PMC9689406; doi:10.3390/diagnostics12112733)
Supplement: Supplementary file 1 [file diagnostics-12-02733-s001.zip › diagnostics-1995962-supplementary.pdf]

## Part A- LIST OF EXTRACTED FEATURES

### FIRST-ORDER FEATURES:

10th Percentile  
90th Percentile  
Energy  
Entropy  
Interquartile Range  
Kurtosis  
Maximum  
Mean Absolute Deviation  
Mean  
Median  
Minimum  
Range  
Robust Mean Absolute Deviation  
Root Mean Squared  
Skewness  
Total Energy  
Uniformity  
Variance

### SHAPE-BASED FEATURES:

Mesh Volume  
Voxel Volume  
Surface Area  
Surface Area to Volume ratio  
Sphericity  
Maximum 2D Diameter (Slice)  
Maximum 2D Diameter (Column)  
Maximum 2D Diameter (Row)  
Maximum 3D Diameter  
Major Axis Length  
Minor Axis Length  
Least Axis Length  
Elongation  
Flatness

## HIGHER-ORDER FEATURES:

### GLCM:

Autocorrelation  
Joint Average  
Cluster Prominence  
Cluster Shade  
Cluster Tendency  
Contrast  
Correlation  
Difference Average  
Difference Entropy  
Difference Variance  
Joint Energy  
Joint Entropy  
Informational Measure of Correlation  
(IMC) 1  
Informational Measure of Correlation  
(IMC) 2  
Inverse Difference Moment (IDM)  
Inverse Difference Moment  
Normalised  
Inverse Difference (ID)  
Inverse Difference Normalised (IDN)  
Inverse Variance  
Maximum Probability  
Sum Entropy  
Sum of Squares

### GLRM:

Grey Level Non-Uniformity  
Grey Level Non-Uniformity  
Normalised  
Grey Level Variance  
High Grey Level Run Emphasis  
Long Run Emphasis  
Long Run High Grey Level Emphasis  
Long Run Low Grey Level Emphasis  
Low Grey Level Run Emphasis  
Run Entropy  
Run Length Non-Uniformity  
Run Length Non-Uniformity  
Normalised  
Run Percentage  
Run Variance  
Short Run Emphasis  
Short Run High Grey Level Emphasis  
Short Run Low Grey Level Emphasis

#### GLSZM:

Grey Level Non-Uniformity  
Grey Level Non-Uniformity  
Normalised  
Grey Level Variance  
High Grey Level Zone Emphasis  
Large Area Emphasis  
Large Area High Grey Level Emphasis  
Large Area Low Grey Level Emphasis  
Low Grey Level Zone Emphasis  
Size Zone Non-Uniformity  
Size Zone Non-Uniformity Normalised  
Small Area Emphasis  
Small Area High Grey Level Emphasis  
Small Area Low Grey Level Emphasis  
Zone Entropy  
Zone Percentage  
Zone Variance

#### GLSZM:

Dependence Entropy  
Dependence Non-Uniformity  
Dependence Non-Uniformity  
Normalised  
Dependence Variance  
Grey Level Non-Uniformity  
Grey Level Variance  
High Grey Level Emphasis  
Large Dependence Emphasis  
Large Dependence High Grey Level  
Emphasis  
Large Dependence Low Grey Level  
Emphasis  
Low Grey Level Emphasis  
Small Dependence Emphasis  
Small Dependence High Grey Level  
Emphasis  
Small Dependence Low Grey Level  
Emphasis

#### NGTDM:

Busyness  
Coarseness  
Complexity  
Contrast  
Strength

## Part B- DISTRIBUTION OF CLINICAL VARIABLES AMONG THE DIFFERENT INSTITUTIONS

*Table S1- Distribution of clinical variables among the different institutions*

| Variable                              | Type           | CHUM               | CHUS               | HGJ                | HMR                |
|---------------------------------------|----------------|--------------------|--------------------|--------------------|--------------------|
| Gender                                | Female         | 6                  | 10                 | 17                 | 9                  |
|                                       | Male           | 26                 | 24                 | 74                 | 29                 |
| Age                                   | Range          | 47-82              | 51-81              | 18-84              | 49-85              |
|                                       | Mean $\pm$ STD | 66.4 $\pm$ 8.8     | 63.2 $\pm$ 7.9     | 61.1 $\pm$ 10.9    | 62.4 $\pm$ 9.1     |
| Time from diagnosis to last follow-up | Range          | 350-2012           | 462-2841           | 361-3402           | 194-2136           |
|                                       | Mean $\pm$ STD | 1250.1 $\pm$ 422.1 | 1509.3 $\pm$ 762.7 | 1612.3 $\pm$ 754.1 | 1230.3 $\pm$ 596.5 |
| Time of treatment                     | Range          | 38-54              | 21-54              | 38-209             | 42-91              |
|                                       | Mean $\pm$ STD | 45.9 $\pm$ 2.5     | 47.4 $\pm$ 6.3     | 46.1 $\pm$ 17.6    | 47.8 $\pm$ 7.5     |
| Tumour Primary Site                   | Hypopharynx    | 0                  | 1                  | 4                  | 6                  |
|                                       | Larynx         | 0                  | 10                 | 14                 | 9                  |
|                                       | Nasopharynx    | 3                  | 1                  | 14                 | 6                  |
|                                       | Oropharynx     | 24                 | 22                 | 55                 | 17                 |
|                                       | Unknown        | 5                  | 0                  | 4                  | 0                  |
| T- Stage                              | T1             | 6                  | 3                  | 20                 | 2                  |
|                                       | T2             | 10                 | 11                 | 20                 | 16                 |
|                                       | T3             | 10                 | 14                 | 35                 | 9                  |
|                                       | T4             | 1                  | 6                  | 12                 | 10                 |
|                                       | Tx             | 5                  | 0                  | 4                  | 1                  |
| N-Stage                               | N0             | 0                  | 13                 | 12                 | 4                  |
|                                       | N1             | 0                  | 6                  | 18                 | 4                  |
|                                       | N2             | 28                 | 15                 | 58                 | 25                 |
|                                       | N3             | 4                  | 0                  | 3                  | 5                  |
| TNM- Stage                            | Stage I        | 0                  | 1                  | 1                  | 0                  |
|                                       | Stage II       | 0                  | 6                  | 5                  | 2                  |
|                                       | Stage III      | 1                  | 9                  | 28                 | 5                  |
|                                       | Stage IV       | 28                 | 18                 | 57                 | 31                 |
|                                       | Unknown        | 3                  | 0                  | 0                  | 0                  |
| HPV- Status                           | Positive       | 10                 | 4                  | 30                 | 2                  |
|                                       | Negative       | 1                  | 5                  | 30                 | 0                  |
|                                       | Unknown        | 21                 | 25                 | 31                 | 36                 |

|           |                         |    |    |    |    |
|-----------|-------------------------|----|----|----|----|
| Surgery   | Yes                     | 0  | 0  | 11 | 0  |
|           | No                      | 0  | 0  | 80 | 0  |
|           | Unknown                 | 32 | 34 | 0  | 38 |
| Treatment | Only Radiation          | 0  | 12 | 5  | 6  |
|           | Chemo- Radiation        | 32 | 22 | 86 | 32 |
| Outcome   | Locoregional Recurrence | 6  | 6  | 12 | 8  |
|           | Distant Metastasis      | 3  | 7  | 16 | 10 |
|           | Death                   | 3  | 9  | 14 | 16 |

To make an accurate and precise diagnosis, the physician has to evaluate the patient according to his symptoms, based on his clinical and hereditary history and a combination of tests. The exams and tests performed may vary according to the patient's complaints, however, in general, the initial evaluation consists of a combination of an inspection test, palpation, indirect mirror examination and direct endoscopy. Under suspicion of the presence of cancer, it is necessary to perform a biopsy, that is, an invasive procedure in which a tissue sample is collected for later microscopic analysis [25],[39],[28]. Medical imaging have an important role in tumour diagnosis since they allow its visualization and evaluation.

For an initial evaluation, all patients usually undergo a Computerized Tomography (CT) or Magnetic Resonance Imaging (MRI). Patients considered to have a high metastatic risk and/or secondary malignant tumours should also undergo a Positron Emission Tomography (PET) examination. The PET examination can be used both for an initial assessment (e.g., locating primary tumours of unknown site) and for re-assessment after treatment, as it allows the identification of persistent tumours, i.e., tumour recurrences. The PET/CT combination has been highly used for tumour detection and therapeutic planning and monitoring. Technological advances in medical imaging have contributed to the oncologic advance, however, these methods still lack valuable information in the evaluation of tumour progress and involvement [25],[40].

The knowledge of the stage of the disease is paramount for the physician to plan the best treatment. Currently, oncologists use the Tumour- Node- Metastasis (TNM) classification system developed by the American Joint Committee on Cancer and the Union for International Cancer Control. The T indicates the size and extent of the primary tumour and invasive characteristics. The N evaluates the spread of regional lymph nodes. Finally, the M reveals the presence or absence of distant metastasis. In opposition to the T and M classification systems,

which are independent of the site of occurrence, the N classification system differs if the tumour has developed in the nasopharynx [25],[40],[9],[27],[29].

Patients with the same tumour location and classified with the same stage may present different responses to the same treatment and, consequently, present disparate clinical results. Thus, the choice of the best and most appropriate treatment for each case takes into consideration not only the tumour location, size, invasion, histological type and its stage, but also specific factors of the patient (e.g. his clinical status and comorbidities) [28],[27]. The decision is made jointly by oncologists and surgeons, radiation oncologists, dentists, as well as nutritionists and rehabilitation therapists and the treatment possibilities in the last 4 decades are mainly surgery, platinum and radiation-based therapies, chemotherapy, or a combination of them [28],[40],[27],[32].

## Part C- DISTRIBUTION OF HEAD AND NECK CANCER OUTCOME DATA

### 1. Locoregional Recurrences (LR)

Considering that LR=0 is representative of cases in which there are no locoregional recurrences and LR=1 is representative of cases in which there are locoregional recurrences, it is possible to verify a higher incidence of the first scenario. In training cases there are 107 and 18 cases of LR=0 and LR=1, respectively. In test cases there are 56 and 14 cases of LR=0 and LR=1, respectively.

Figure S1 shows that the data is very poorly distributed, with a tendency or class distortion.

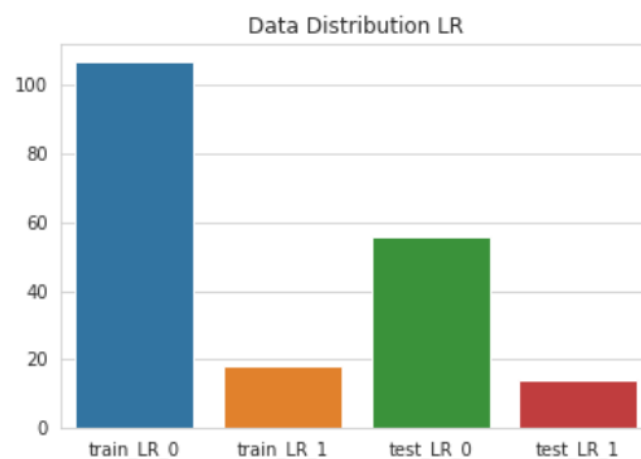

Figure S1- Data distribution for the LR prediction.

### 2. Distant Metastasis (DM)

Assuming that DM=0 represents cases where there are no distant metastasis and DM=1 represents cases where there are distant metastasis, in Figure S2 it is possible to verify that there is again a higher prevalence in negative cases. In training cases there are 102 and 23 cases of DM=0 and DM=1, respectively. In test cases there are 57 and 13 cases of DM=0 and DM=1, respectively.

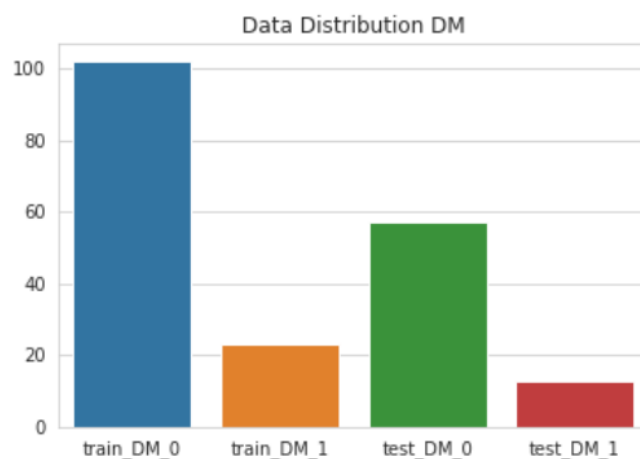

Figure S2- Data distribution for the DM prediction.

### 3. Overall Survival (OS)

OS=0 and OS=1 represent, respectively, the cases in which the patient survives and does not survive. In Figure S3 is, again, possible to verify a great imbalance in the data. In the training cases there are 102 and 23 of OS=0 and OS=1, respectively. In the test cases there are 51 and 19 cases of OS=0 and OS=1, respectively.

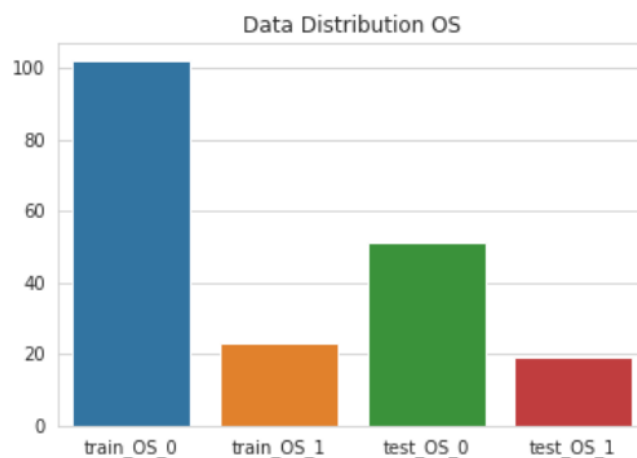

Figure S3- Data distribution for the OS prediction.

## Part D- HYPERPARAMETERS

Table S2- The XGBOOST HYPERPARAMETERS IN EXPERIMENT 2, WHICH ACHIEVED THE HIGHEST AUC VALUES IN LR, DM AND OS PREDICTIONS.

| Hyperparameters  | LOCOREGIONAL<br>RECURRENCES | DISTANT<br>METASTASIS | OVERALL<br>SURVIVAL |
|------------------|-----------------------------|-----------------------|---------------------|
| seed             | 42                          | 42                    | 42                  |
| learning rate    | 0.15                        | 0.20                  | 0.30                |
| N_ESTIMATORS     | 400                         | 100                   | 400                 |
| MAX_DEPTH        | 5                           | 6                     | 3                   |
| MIN_CHILD_WEIGHT | 4                           | 5                     | 3                   |
| GAMMA            | 0.00                        | 0.00                  | 0.00                |
| REG_ALPHA        | 0.40                        | 0.00                  | 0.20                |
| REG_LAMBDA       | 0.90                        | 0.90                  | 0.90                |
| SUBSAMPLE        | 0.80                        | 0.40                  | 0.90                |
| COLSAMPLE_BYTREE | 0.80                        | 0.80                  | 0.50                |
| SCALE_POS_WEIGHT | 16                          | 18                    | 18                  |

## REFERENCES

- [9] L. Mao, W. K. Hong, and V. A. Papadimitrakopoulou, Focus on head and neck cancer, pp. 311–316, 2004.
- [25] A.C.S. Poon, K.M. Stenson. Overview of the diagnosis and staging of head and neck cancer. In: UpToDate, Post, TW (Ed), UpToDate, Waltham, MA, 2012.
- [27] A.C.S. Poon, K.M. Stenson. Overview of treatment for head and neck cancer. In: UpToDate, Post, TW (Ed), UpToDate, Waltham, MA, 2015.
- [28] O. Kaidar-person, Z. Gil, and S. Billan, Precision medicine in head and neck cancer, *Drug Resist. Updat.*, 2018.
- [29] J. A. Brennan and D. Sidransky, Molecular staging of head and neck squamous carcinoma, pp. 3–10, 1996.
- [32] J. E. Nör, J. S. Gutkind, Head and Neck Cancer in the New Era of Precision Medicine, *J. Dent. Res.*, vol. 97, no. 6, pp. 601–602, 2018.
- [39] N. C. Institute, Head and Neck Cancers, 2017. [Online]. Available: <https://www.cancer.gov/types/head-and-neck/head-neck-fact-sheet>. [Accessed: 10-Aug-2020].
- [40] S. On, Head and Neck Cancer: Changing Epidemiology, Diagnosis, and Treatment, vol. 83, no. April, pp. 489–501, 2008.
